# Supplementary material
Source: Springer Nature journal article supplement (https://www.springermedizin.de/resource/supplementary/12879_2006_403_MOESM2_ESM.pdf/9448592)

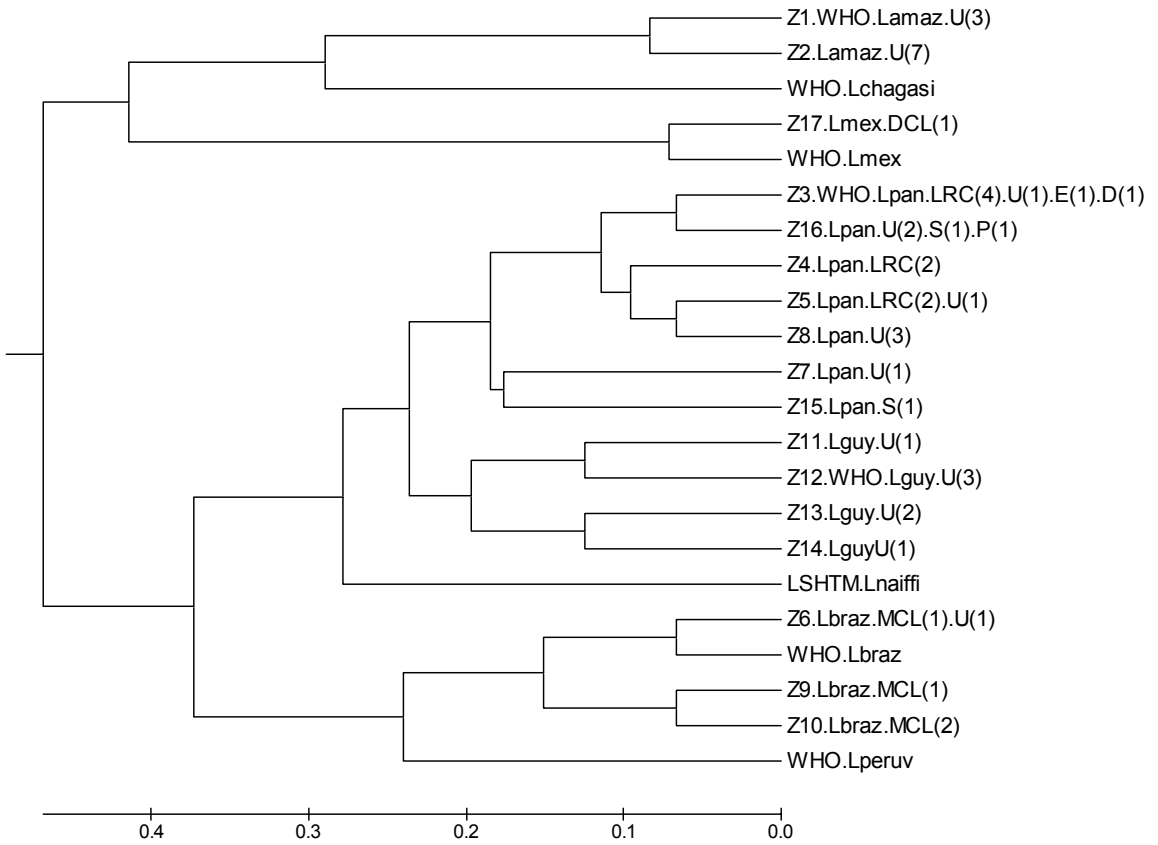

**A**

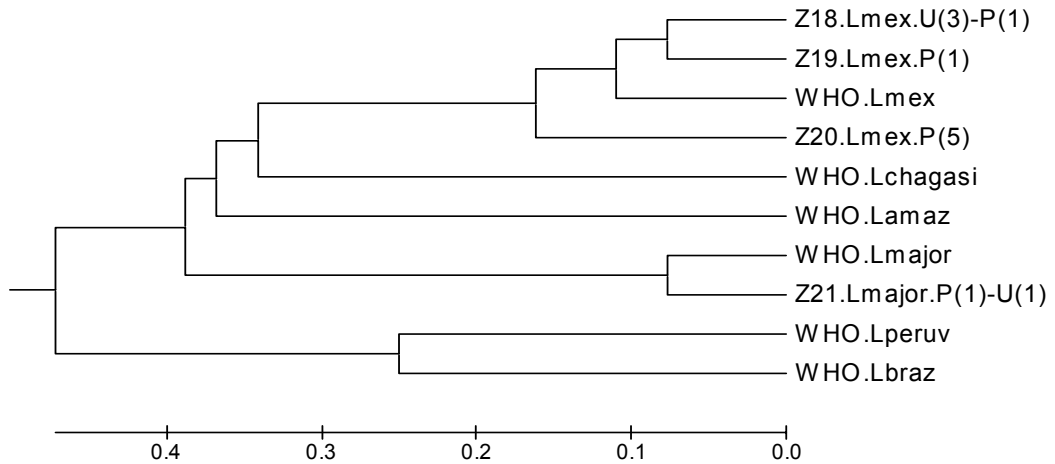

**B**

Supplement: MOESM2 [file 9448592]
